# Supplementary material for: Peroxisome Proliferator-Activated Receptor-γPrevents Cholesterol Gallstone Formation in C57bl Mice by Regulating Bile Acid Synthesis and Enterohepatic Circulation
Source: Hindawi journal article supplement (doi:10.1155/2018/7475626), 2018-07-12
Supplement: f1 [file 7475626.f1.pdf]

**Supplementary table 1.** siRNAs targeting LXR $\alpha$  and FXR

| siRNA                   | Primer (5'-3')                                       |
|-------------------------|------------------------------------------------------|
| LXR $\alpha$ -homo-568  | F: GCUUCCACUACAAUGUUCUTT<br>R: AGAACAUUGUAGUGGAAGCTT |
| LXR $\alpha$ -homo-1045 | F: GCAGGAGAUAGUUGACUUUTT<br>R: AAAGUCAACUAUCUCCUGCTT |
| LXR $\alpha$ -homo-1176 | F: GGAGUGAGAGUAUCACCUUTT<br>R: AAGGUGAUACUCUCACUCCTT |
| FXR-homo-1070           | F: CAGGCUUGUUAACUGAAAUTT<br>R: AUUUCAGUUAACAAGCCUGTT |
| FXR-homo-1282           | F: CCUCAGGAAAUAACAAAUATT<br>R: UAUUUGUUAUUUCCUGAGGTT |
| FXR-homo-711            | F: GUGGUACUCUCCUGGAAUATT<br>R: UAUUCCAGGAGAGUACCACTT |
| Scramble                | F: UUCUCCGAACGUGUCACGUTT<br>R: ACGUGACACGUUCGGAGAATT |

F: Forward; R: Reverse; LXR $\alpha$ : liver X receptor  $\alpha$ ; FXR: farnesoid X receptor

**Supplementary table 2.** Primer sequences for real-time PCR

| Gene             | Primer sequences (5'-3')      |
|------------------|-------------------------------|
| mPPAR $\gamma$ * | F: TCTCAGTGGAGACCGCCCAGG      |
| mPPAR $\gamma$ * | R: GCTGCACGTGCTCTGTGACGAT     |
| mCyp7a1          | F: GTCCGGATATTCAAGGATGCA      |
| mCyp7a1          | R: AGCAACTAAACAACCTGCCAGTACTA |
| mABCG5           | F: TGCCCATTCCTTTAAAAATCC      |
| mABCG5           | R: GATGAACTGGACCCCTTGG        |
| mABCG8           | F: GTAGCTGATGCCGATGACAA       |
| mABCG8           | R: GGGGCTGATGCAGATTCA         |
| mABCA1           | F: AATTCTCAAGTGCAAACACTTCTGG  |
| mABCA1           | R: GAGGCATATGCTTGCGGTACA      |
| mABCG1           | F: GTCTCAGCCTTCTAAAGTTCCTC    |
| mABCG1           | R: TCTCTCGAAGTGAATGAAATTTATCG |
| mLXR             | F: TAGGGATAGGGTTGGAGTCAG      |
| mLXR             | R: AGTCAACAATCTCCTGCACGG      |
| mBSEP            | F: TGGAAAGGAATGGTGATGGG       |
| mBSEP            | R: CAGAAGGCCAGTGCATAACAGA     |
| mLDLR            | F: CTGTGGGCTCCATAGGCTATCT     |
| mLDLR            | R: GCGGTCCAGGGTCATCTTC        |
| mSR-B1           | F: GGCTGCTGTTTGCTGCG          |
| mSR-B1           | R: GCTGCTTGATGAGGGAGGG        |
| mMrp2            | F: TCCAGGACCAAGAGATTTGC       |
| mMrp2            | R: TCTGTGAGTGCAAGAGACAGGT     |
| mMrp3            | F: AGTGGCTGTGATAGTCTTGCTGATA  |
| mMrp3            | R: CCGTTCAGGATCTCGCTCAT       |
| mMrp4            | F: ACCTCTGCTCGCGCGTGTCT       |
| mMrp4            | R: CCAGTACCGTTGAAGCTCCTCTCC   |
| mAbcb4           | F: CCGCTATGGCCGTGGGAATGTAA    |
| mAbcb4           | R: ACTCAGCTGCGCCCCTCTATCACC   |
| mNpc1l1          | F: AGTGCGGTGTTTGCTGGAGTGG     |
| mNpc1l1          | R: AGGAGTTGAGGCGGAAGAAGAAA    |
| mASBT            | F: TGGGTTTCTTCCTGGCTAGACT     |
| mASBT            | R: TGTTCTGCATTCCAGTTTCCAA     |
| mNTCP            | F: GCATGATGCCACTCCTCTTATAC    |
| mNTCP            | R: TACATAGTGTGGCCTTTTGGACT    |
| mFXR*            | F: TGGGTACCAGGGAGAGACTG       |
| mFXR*            | R: GTGAGCGCGTTGTAGTGGTA       |
| mCYP27A1         | F: GACAACCTCCTTTGGGACTTAC     |
| mCYP27A1         | R: GTGGTCTCTTATTGGGTACTTGC    |
| mOst $\alpha$    | F: TTGTGATCAACCGCATTTGT       |
| mOst $\alpha$    | R: CTCCTCAAGCCTCCAGTGTC       |
| mOst $\beta$     | F: ATCCTGGCAAACAGAAATCG       |

|                |                             |
|----------------|-----------------------------|
| mOst $\beta$   | R: GGCCAAGTCTGGTTTCTCTG     |
| mPCG1 $\alpha$ | F: GAAAGGGCCAAACAGAGAGA     |
| mPCG1 $\alpha$ | R: GTAAATCACACGGCGCTCTT     |
| mLXR $\alpha$  | F: TAGGGATAGGGTTGGAGTCAG    |
| mLXR $\alpha$  | R: AGTTTCTTCAAGCGGATCTGT    |
| mCYP8B1        | F: GAATCTAACCAGGCCATGCT     |
| mCYP8B1        | R: AGGAGCTGGCACCTAGACT      |
| mGADPH         | F: GCTCGGCCGGCTGGAAGAACT    |
| mGADPH         | R: CCCTCGTTCTGCACGCGGAT     |
| hPPAR $\gamma$ | F: GCTGTGCAGGAGATCACAGA     |
| hPPAR $\gamma$ | R: GGGCTCCATAAAGTCACCAA     |
| hLXR $\alpha$  | F: AAGCCCTGCATGCCTACGT      |
| hLXR $\alpha$  | R: TGCAGACGCAGTGCAAACA      |
| hLXR $\beta$   | F: TCGTGGACTTCGCTAAGCAA     |
| hLXR $\beta$   | R: GCAGCATGATCTCGATAGTGGA   |
| hFXR           | F: TCGTGGACTTCGCTAAGCAA     |
| hFXR           | R: TCTCCTGGGTCGCCTGACT      |
| hBSEP          | F: ACATGCTTGCGAGGACCTTTA    |
| hBSEP          | R: GGAGGTTCGTGCACCAGGTA     |
| hMRP2          | F: GGCAGTGAAGAAGAAGACGATGA  |
| hMRP2          | R: ATTGGACCTAGAACTGCGGCT    |
| hMRP4          | F: TGCAAGGGTTCTGGGATAAAGA   |
| hMRP4          | R: CTTTGGCACTTTCCTCAATTAACG |
| hABCG5         | F: CCCAAGGGACTCCGGGGTCA     |
| hABCG5         | R: GACCCATGGACCCTCCGGGG     |
| hABCG8         | F: CTTCTACCTCGCCGGGGGCT     |
| hABCG8         | R: CCGCGATGGTGAGGTTCCCG     |
| hABCA1         | F: GAAGTACATCAGAACATGGGC    |
| hABCA1         | R: GATCAAAGCCATGGCTGTAG     |
| hABCG1         | F: CAGGAAGATTAGACACTGTGG    |
| hABCG1         | R: GAAAGGGGAATGGAGAGAAG     |
| hLDLR          | F: CCCAGCGAAGATGCGAAGATAT   |
| hLDLR          | R: GGTGAAGAAGAGGTAGGCGATG   |
| hABCB4         | F: AACCCCAAGATCCTTCTGCT     |
| hABCB4         | R: GGACCGTAGACAGTCGGTGT     |
| hCYP27A1       | F: AAGCGATACCTGGATGGTTG     |
| hCYP27A1       | R: TGTTGGATGTCTGTCCACT      |
| hGAPDH         | F: ACCATCATCCCTGCCTCTAC     |
| hGAPDH         | R: CCTGTTGCTGTAGCCAAAT      |

---

m: mouse; h: human.

\* The oligos for PPAR $\gamma$  and FXR were for the total amount (all isoforms) since they are designed to measure the conserved regions of the genes.
